# Supplementary material for: Improved Chemical and Radiochemical Synthesis of Neuropeptide Y Y2 Receptor Antagonist N-Methyl-JNJ-31020028 and Preclinical Positron Emission Tomography Studies
Source: MDPI journal article supplement (doi:10.3390/ph17040474), 2024-04-08
Supplement: s1 [file s1]

## Supporting information

### Improved chemical and radiochemical synthesis of Neuropeptide Y Y<sub>2</sub> receptor antagonist *N*-Methyl-JNJ-31020028 and preclinical PET studies

Inês C. F. Fonseca, Mariana Lapo Pais, Fábio M. S. Rodrigues, José Sereno, Miguel Castelo-Branco, Cláudia Cavadas, Mariette M. Pereira and Antero J. Abrunhosa

|                                                                                      |    |
|--------------------------------------------------------------------------------------|----|
| Characterisation of <i>N</i> -Me-JNJ-31020028.....                                   | S2 |
| ▪ <sup>1</sup> H-NMR.....                                                            | S2 |
| ▪ <sup>13</sup> C-NMR.....                                                           | S3 |
| ▪ <sup>1</sup> H- <sup>1</sup> H COSY (Correlated spectroscopy).....                 | S4 |
| ▪ NOESY spectrum.....                                                                | S4 |
| ▪ <sup>1</sup> H- <sup>13</sup> C HSQC (Heteronuclear Single Quantum Coherence)..... | S5 |
| ▪ <sup>1</sup> H- <sup>13</sup> C HMBC (Heteronuclear Single Quantum Coherence)..... | S5 |
| ▪ HRMS spectrum.....                                                                 | S6 |
| HPLCs.....                                                                           | S6 |
| Pre-clinical studies.....                                                            | S7 |

## Characterisation of *N*-Me-JNJ-31020028

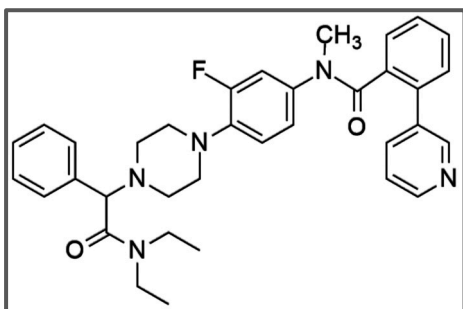

$^1\text{H-NMR}$  (400 MHz,  $\text{CDCl}_3$ )  $\delta$ /ppm: 8.51 (d,  $J = 4.0$  Hz, 1H), 8.15 (d,  $J = 1.4$  Hz, 1H), 7.5 (d,  $J = 7.2$  Hz, 1H), 7.41 (d,  $J = 7.8$  Hz, 1H), 7.31-7.23 (m, 5H), 7.21-7.18 (m, 1H), 7.02 (d,  $J = 7.2$  Hz, 1H), 6.38 (t,  $J = 9.0$  Hz, 1H), 5.84 (dd,  $J = 8.5, 2.4$  Hz, 1H), 5.80 (dd,  $J = 13.3, 2.4$  Hz, 1H), 4.15 (s, 1H), 3.39-3.30 (m, 2H), 3.13 (s, 3H), 3.23-3.08 (m, 2H), 2.92 (brs, 4H) 2.61-2.52 (m, 4H), 1.00 (t,  $J = 7.1$  Hz, 3H), 0.96 (t,  $J = 7.1$  Hz, 3H).  $^{13}\text{C-NMR}$  (100 MHz,  $\text{CDCl}_3$ )  $\delta$ /ppm: 170.6, 169.8, 154.3 (d,  $J = 248.1$  Hz), 149.5, 148.2, 138.5 (d,  $J = 8.5$  Hz), 136.7 (d,  $J = 9.5$  Hz), 136.2, 135.8, 135.8, 135.0, 129.9, 129.5, 129.3, 129.2, 128.7, 128.7, 128.3, 123.0, 122.0 (d,  $J = 2.9$  Hz), 117.9 (d,  $J = 3.4$  Hz), 113.9 (d,  $J = 28.2$  Hz), 70.9, 51.2, 50.5, 41.6, 40.8, 37.1, 12.9, 12.4. HRMS (ESI):  $m/z$  calcd. for  $\text{C}_{35}\text{H}_{39}\text{FN}_5\text{O}_2^+$   $[\text{M}+\text{H}]^+$ : 580.3082, found: 580.3082.

### ■ $^1\text{H-NMR}$

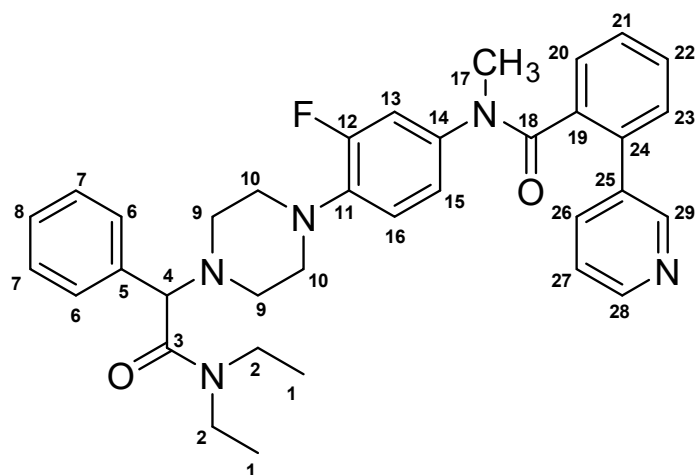

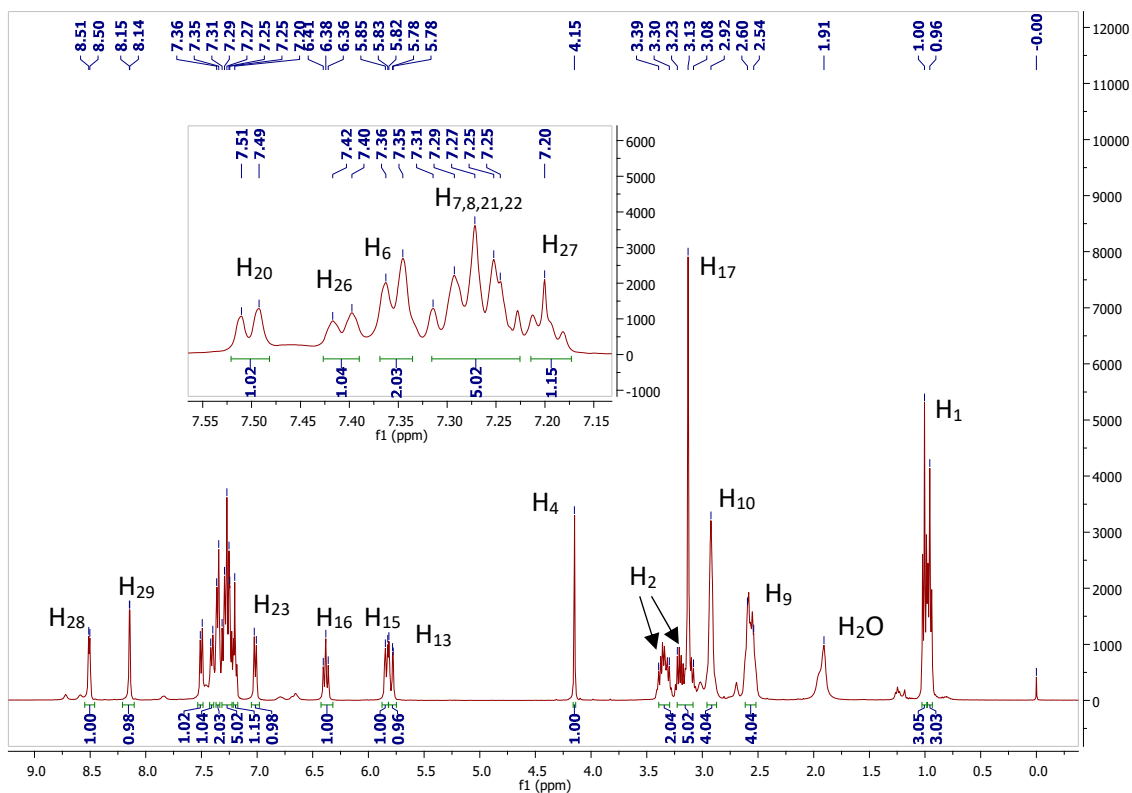

Figure S1-  $^1\text{H}$  NMR spectra of N-Me-JNJ-31020028 ang signal attribution.

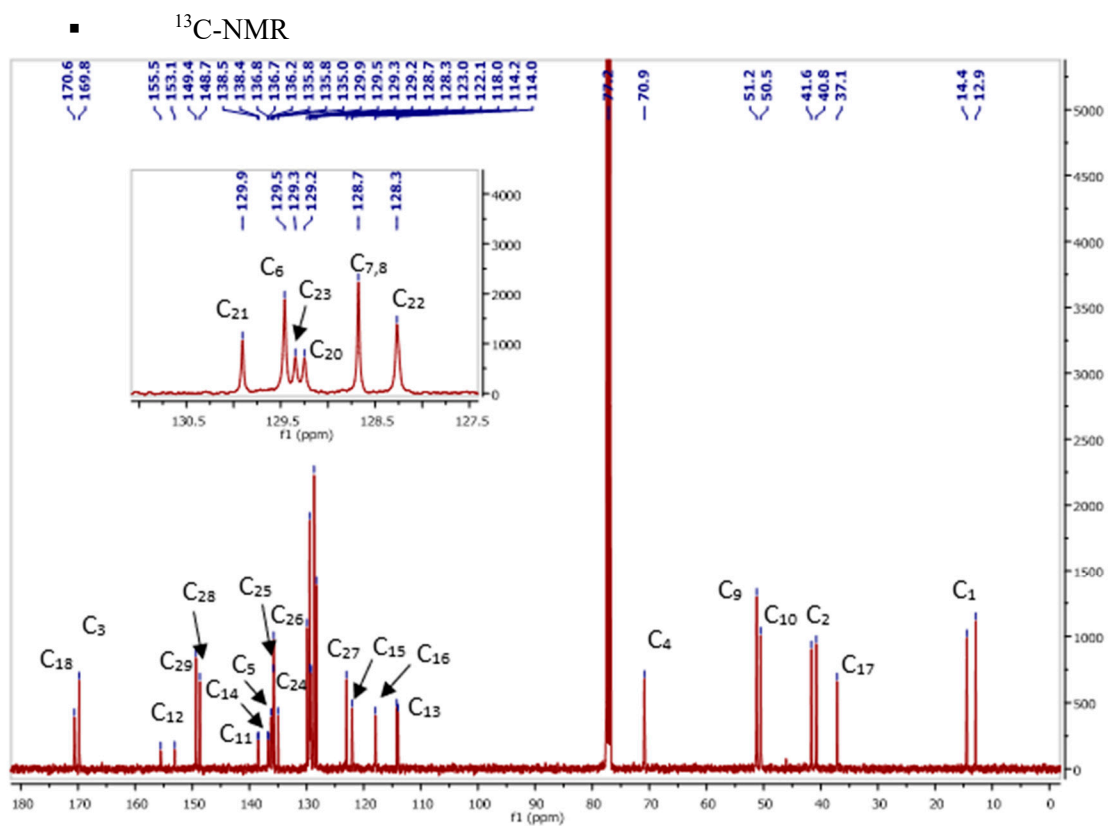

Figure S2-  $^{13}\text{C}$  NMR spectra of N-Me-JNJ-31020028 ang signal attribution.

▪  $^1\text{H}$ - $^1\text{H}$  COSY (Correlated spectroscopy)

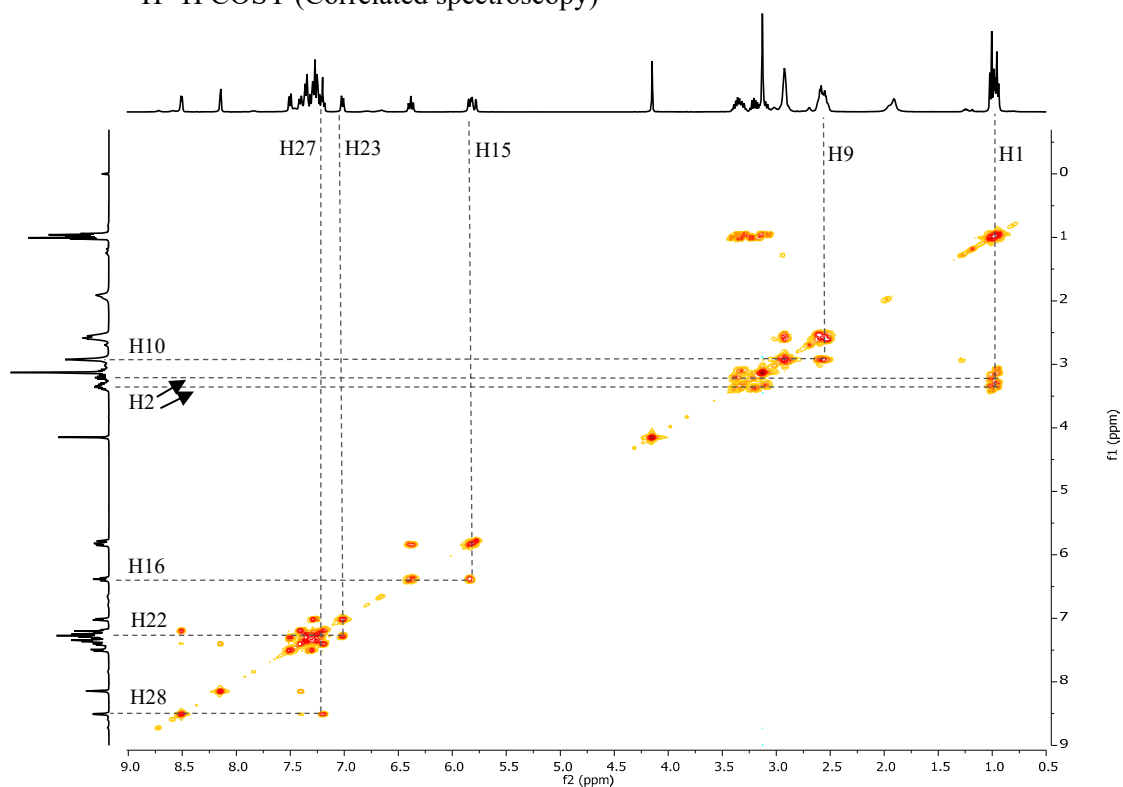

**Figure S3-**  $^1\text{H}$ - $^1\text{H}$  COSY spectra of *N*-Me-JNJ-31020028 and  $^1\text{H}$  signal attribution.

▪ NOESY Spectrum

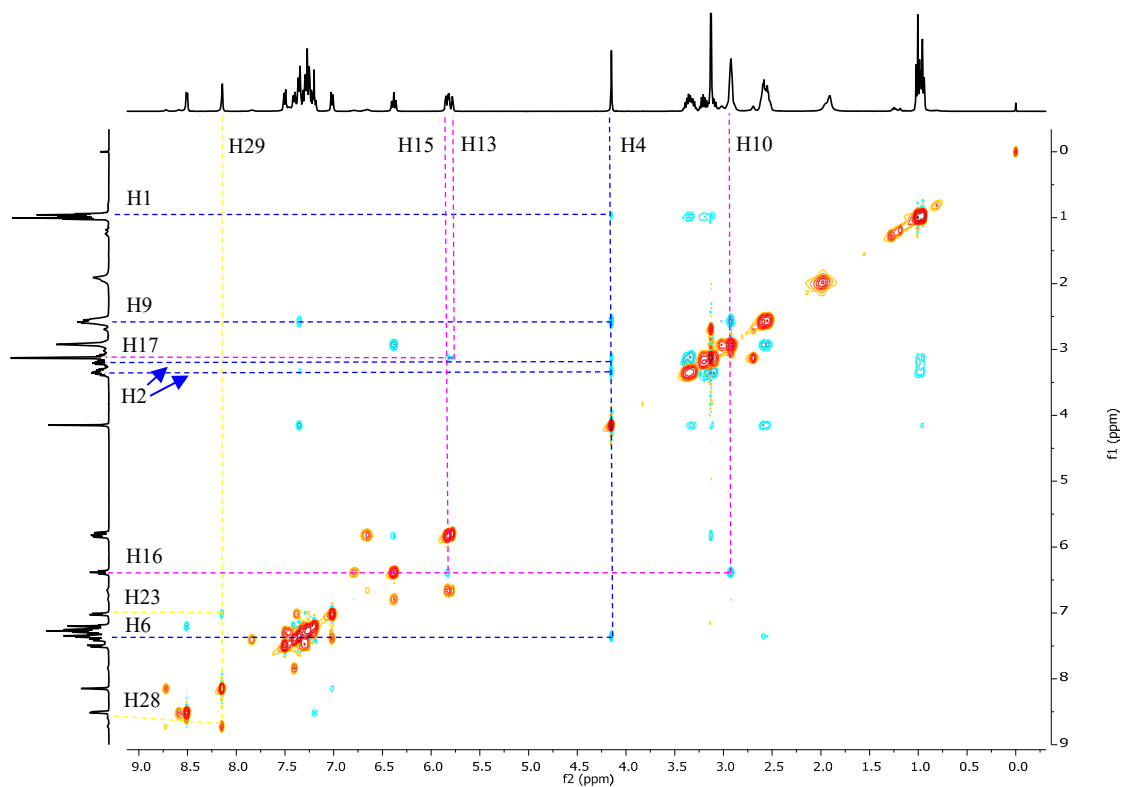

**Figure S4-** NOESY spectrum of *N*-Me-JNJ-31020028. The most relevant correlations regarding the protons H4, H13, H15, H16 and H29 are presented.

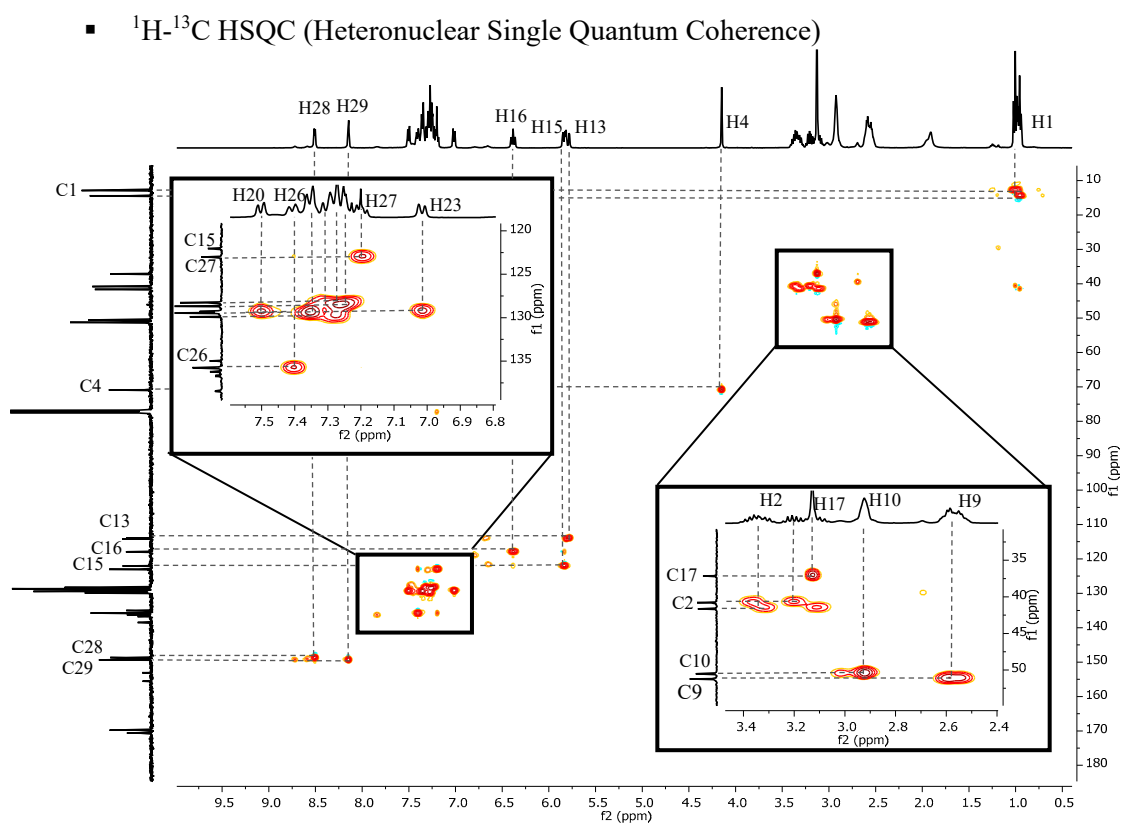

**Figure S5-**  $^1\text{H}$ - $^{13}\text{C}$  HSQC spectrum of *N*-Me-JNJ-31020028 and  $^1\text{H}$  and  $^{13}\text{C}$  signal attribution. Inset: selected expansions of the  $^1\text{H}$ - $^{13}\text{C}$  HSQC spectrum between  $\delta$  2.4 to 3.4 ppm and  $\delta$  6.8 to 7.6 ppm.

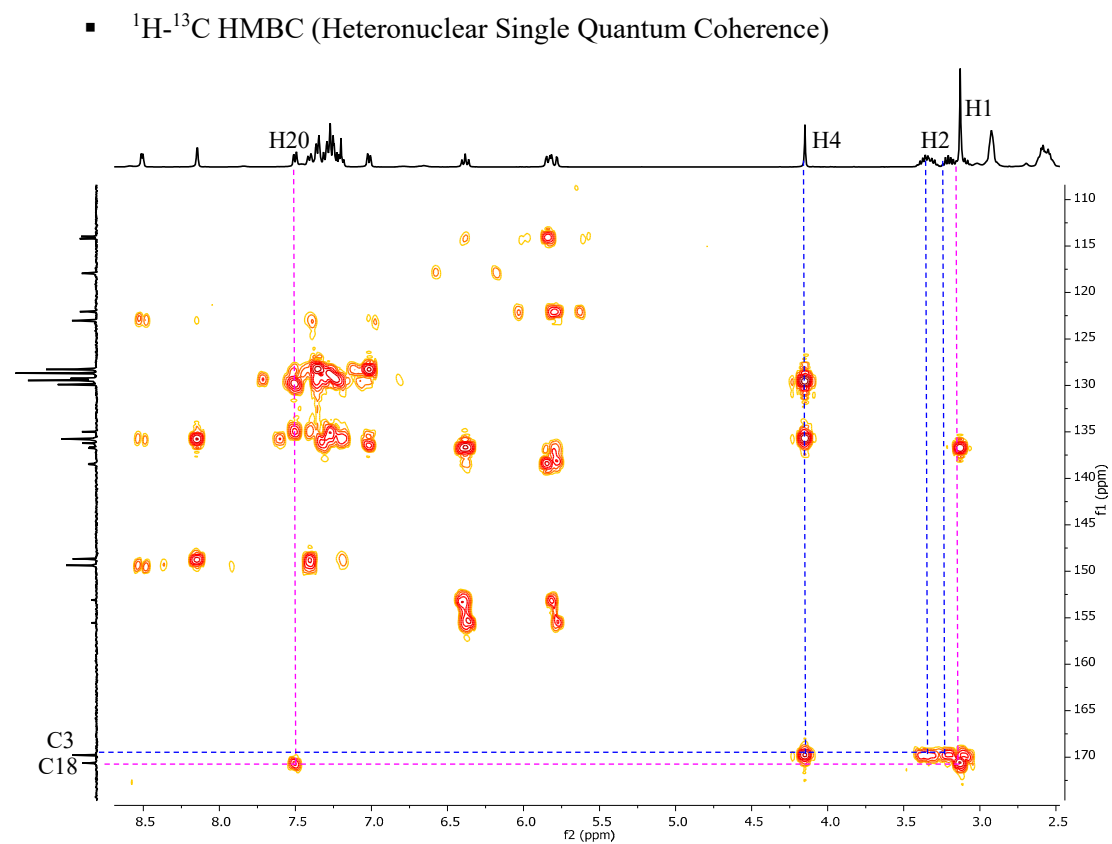

**Figure S6-** Selected expansion of  $^1\text{H}$ - $^{13}\text{C}$  HMBC spectrum of *N*-Me-JNJ-31020028. The most relevant correlations regarding the carbons C3 and C18 are presented.

■ HRMS

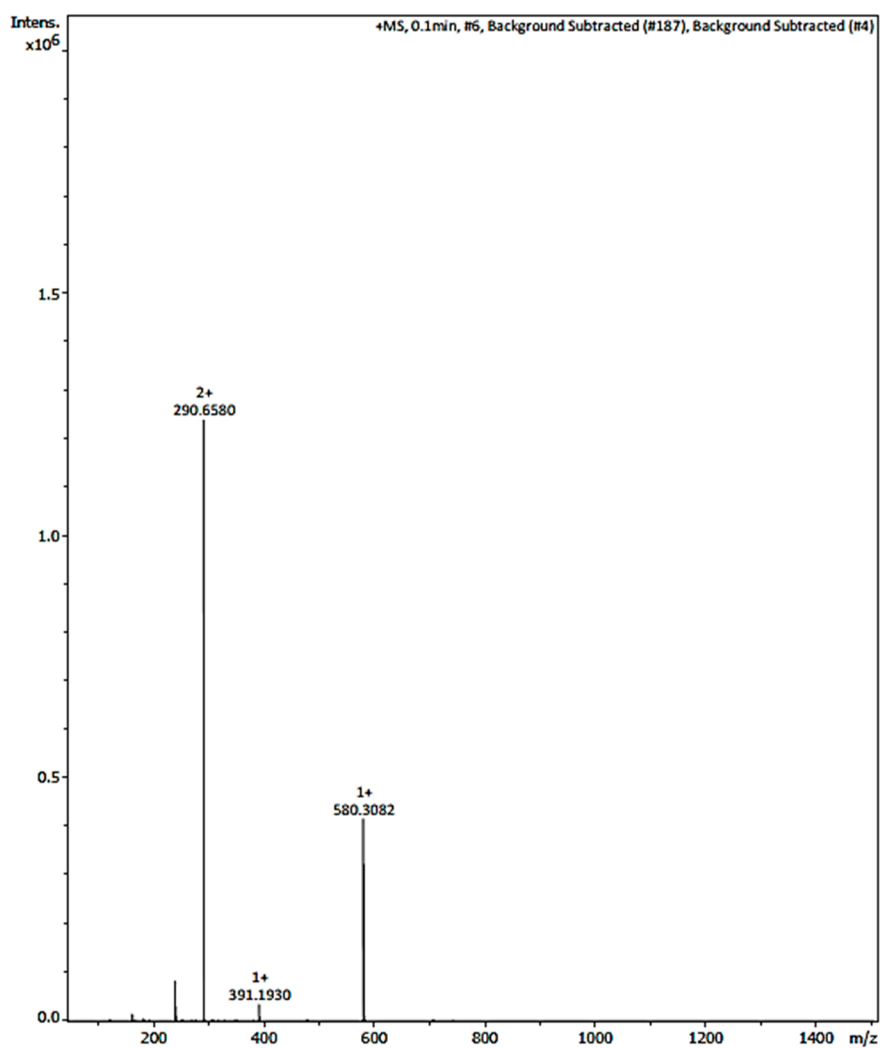

Figure S7- HRMS spectrum of *N*-Me-JNJ-31020028.

HPLCs

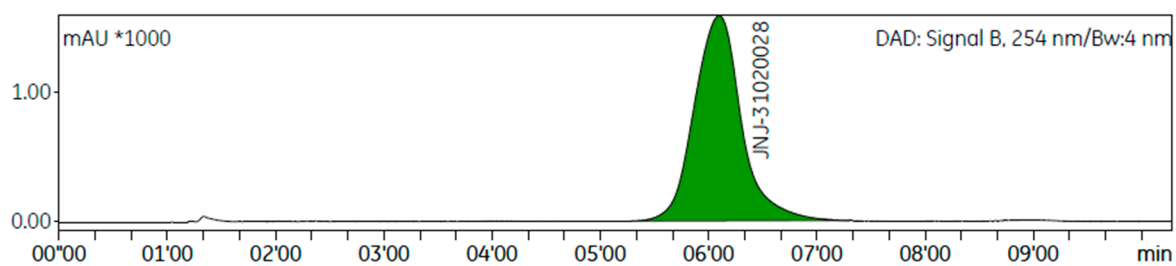

Figure S8- Analytical HPLC chromatogram of precursor JNJ-31020028 1. Rt: 6.06 min.

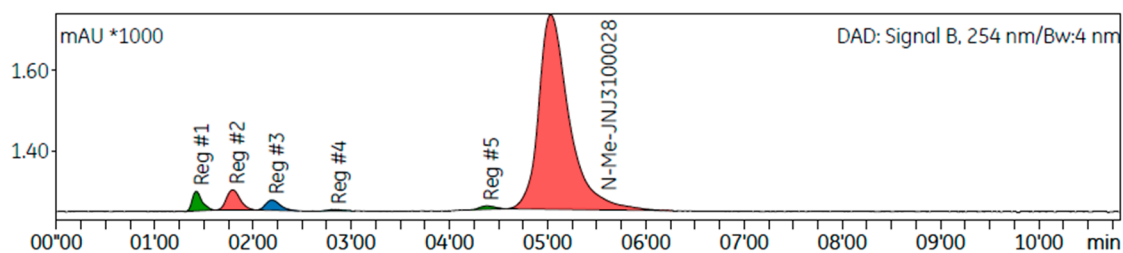

**Figure S9-** Representative analytical HPLC chromatogram of the reaction mixture obtained through continuous flow methodology. Retention times: Reg#1: 1.26 min; Reg#2: 1.48 min; Reg#3: 2.12 min; Reg#4: 2.50 min; Reg#5: 4.23 min; N-Me-JNJ-31020028: 5.02 min.

## Pre-clinical studies

**Table S1-** *In vivo* biodistribution. Values are expressed as percentage injected dose *per* gram (%ID/g) of body weight ( $n = 7$ ).

| Region | Mean   | SEM     |
|--------|--------|---------|
| Brain  | 0.5187 | 0.07698 |
| Gut    | 12.57  | 1.217   |

**Table S2-** Whole body *ex vivo* biodistribution. Values are expressed as percentage injected dose *per* gram (%ID/g) of tissue ( $n = 5$ ).

| Region          | Mean   | SEM     |
|-----------------|--------|---------|
| Blood           | 3.661  | 1.545   |
| Urine           | 84.43  | 59.41   |
| Liver           | 14.33  | 6.39    |
| Spleen          | 1.504  | 0.5483  |
| Lung            | 0.5568 | 0.04036 |
| Heart           | 1.394  | 0.701   |
| Kidney          | 1.986  | 0.4916  |
| Stomach         | 3.082  | 0.7135  |
| Small intestine | 98.64  | 25.57   |
| Large intestine | 2.18   | 0.2095  |
| Muscle          | 0.9318 | 0.193   |

|        |        |         |
|--------|--------|---------|
| Faeces | 3.149  | 1.092   |
| Bile   | 250.1  | 23.97   |
| Brain  | 0.6362 | 0.06454 |

**Table S3-** Brain *ex vivo* biodistribution. Values are expressed as percentage injected dose *per* gram (%ID/g) of tissue (*n* = 5).

| Region                   | Mean   | SEM     |
|--------------------------|--------|---------|
| Cerebellum               | 0.646  | 0.09664 |
| Hypothalamus             | 1.03   | 0.1126  |
| Amygdala                 | 0.9318 | 0.08237 |
| Striatum                 | 1.013  | 0.1068  |
| Pre-frontal cortex (PFC) | 0.636  | 0.05916 |
| Hippocampus              | 0.8976 | 0.09311 |
